# Supplementary material for: Comparison of treatment efficacy between 100% platelet-rich plasma and 100% serum eye drops in moderate-to-severe dry eye disease: a randomised controlled trial protocol
Source: HighWire-hosted journal article supplement (doi:10.1136/bmjopen-2020-048479), 2021-06-01
Supplement: bmjopen-2020-048479supp001_data_supplement.pdf [file bmjopen-2020-048479supp001_data_supplement.pdf]

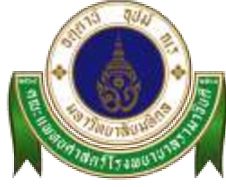

**FACULTY OF MEDICINE RAMATHIBODI HOSPITAL**

**CONSENT BY SUBJECT FOR PARTICIPATION IN A RESEARCH PROTOCOL**

**STUDY TITLE: COMPARISON OF THE EFFICACY BETWEEN 100% PLATELET-RICH PLASMA AND 100% SERUM EYE DROPS IN MODERATE TO SEVERE DRY EYE DISEASE: A RANDOMIZED CONTROLLED TRIAL**

**Investigators:** Assoc. Prof. Passara Jongkhajornpong, M.D.

Assist. Prof. Pawin Numthavaj, M.D.

Assoc. Prof. Kaevalin Lekhanont, M.D.

Assoc. Prof. Thunyarat Anothaisintawee, M.D., Ph.D.

Prof. Ammarin Thakkinstian, Ph.D.

**Name of participant** ..... **Age**.....

**Consent by participant**

I, \_\_\_\_\_ (participant's name), have been clearly informed of the details of the research project, including benefits and risks of the participation. I am aware that I can contact the study investigators if questions or concerns arise. The participation is voluntary and I do not have to sign this form if I do not want to be involved in the study. The personal information collected will be kept confidential and will only be use for research publications or presentations. My name and other identifying information will be removed before this data is used. Identifying information may be reviewed by the institution in case of academic necessity only.

\_\_\_\_\_  
Signature of participants

\_\_\_\_\_  
Witness

Date \_\_\_\_\_

**Consenting Investigator**

I have explained and disclosed the nature and purpose of the study and the risks involved to the parent/guardian of the participant, with no undisclosed information.

\_\_\_\_\_

Signature of Investigator

Date \_\_\_\_\_
